# Supplementary material
Source: HighWire-hosted journal article supplement (https://www.annfammed.org/highwire/filestream/8229/field_highwire_adjunct_files/1/Henry_Supp_Fig.pdf)

# ANNALS OF FAMILY MEDICINE

## Online Supplementary Material

Henry SG, Fetters MD. Video elicitation interviews: a quantitative research method for investigating physician-patient interactions. *Ann Fam Med*. 2012;10(2):118-125.

<http://www.annfammed.org/content/10/2/118/suppl/DC1>

---

### Supplemental Figure. Camera and camera stand used in the authors' video elicitation interview study.

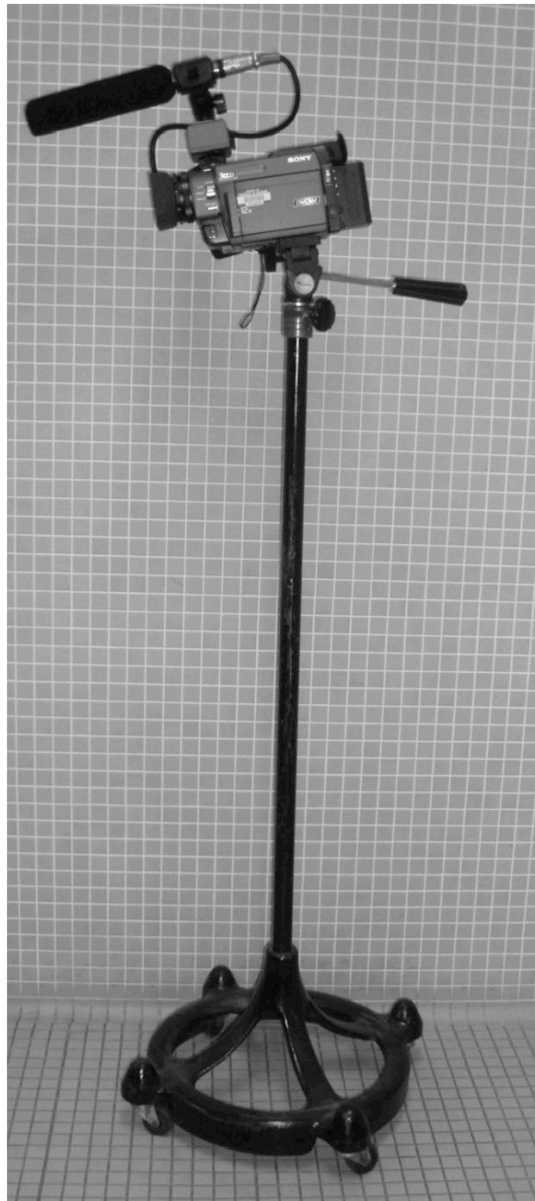

Supplement: Henry_Supp_Fig.pdf [file Henry_Supp_Fig.pdf]
